# Supplementary material for: Procyanidin B1 and p -coumaric acid from whole highland barley ameliorated HFD-induced impaired glucose tolerance via small intestinal barrier and hepatic glucose metabolism
Source: Royal Society of Chemistry journal article supplement (doi:10.1039/d4fo02805h), 2024-01-01
Supplement: d4fo02805h1.pdf [file d4fo02805h1.pdf]

**Table S1. Procyanidin B1 and p-coumaric acid contents in serum of impaired glucose tolerance C57BL/6J mice<sup>1</sup>**

| Samples | Procyanidin B1<br>( $\mu\text{g}/100 \mu\text{g serum}$ ) <sup>2</sup> | p-Coumaric acid<br>( $\mu\text{g}/100 \mu\text{g serum}$ ) <sup>2</sup> |
|---------|------------------------------------------------------------------------|-------------------------------------------------------------------------|
| PBL     | 19.6                                                                   | ND                                                                      |
| PBH     | 27.8                                                                   | ND                                                                      |
| CAL     | ND                                                                     | 6.03                                                                    |
| CAH     | ND                                                                     | 170.00                                                                  |
| PB+CAL  | 25.4                                                                   | 10.03                                                                   |
| PB+CAH  | 31.3                                                                   | 131.00                                                                  |

<sup>1</sup> Serum of procyanidin B1 (PB) and p-coumaric acid (CA) supplemented mice were collected after the whole supplementation period before sacrificed and the contents of PB and CA in corresponding serum were determined by UPLC-MS/MS (PB for Agilent 1260-6420A and CA for Shim-pack UPLC SHIMADZU CBM30A and QTRAP® 4500+, both of them were detected under negative model for ESI).

<sup>2</sup>Quantities of PB and CA contents in serum were calculated according to the ratio compared with peak area of corresponding standards (0.1ppm).

**PBL**

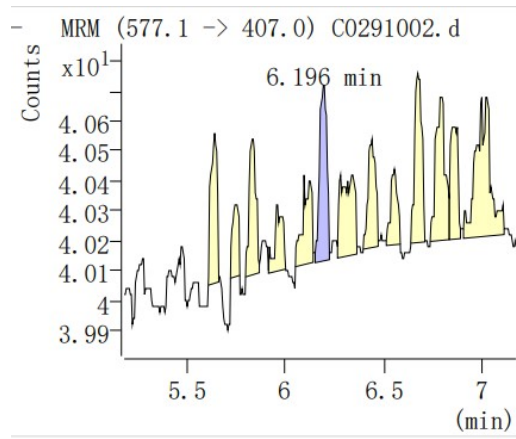

**PBH**

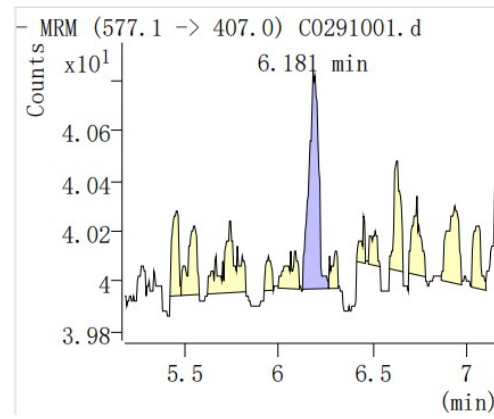

**PB+CAL**

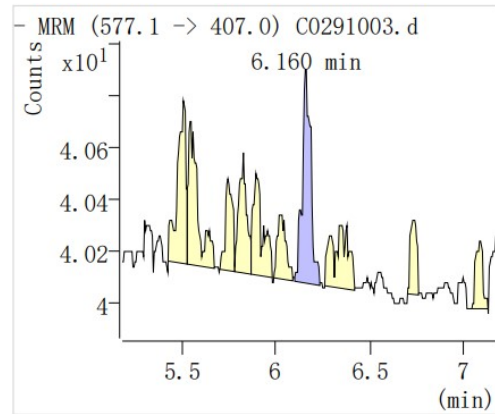

**PB+CAH**

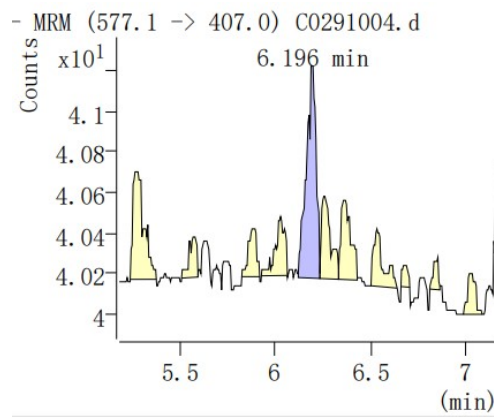

**Standard of procyanidin B1\_0.1ppm**

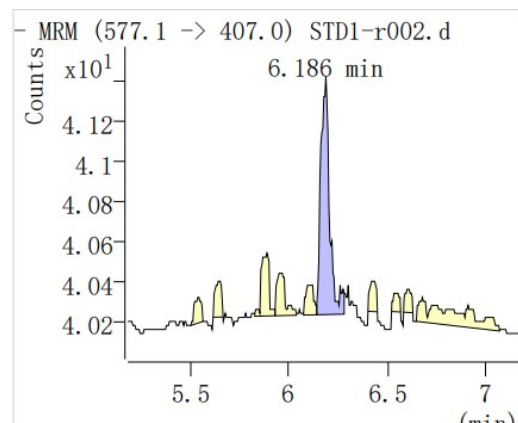

**Figure S1. Chromatography of procyanidin B1 (PB) contents determined from serum using HPLC-MS/MS.**

**CAL**

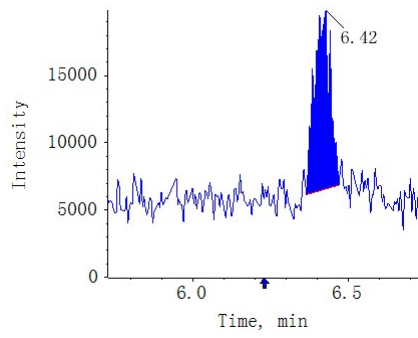

**CAH**

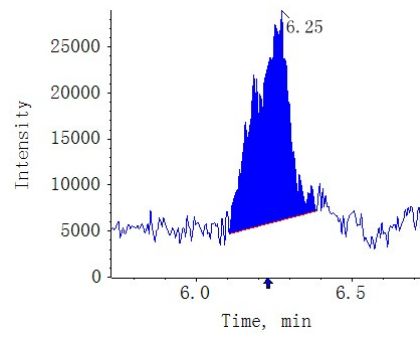

**PB+CAL**

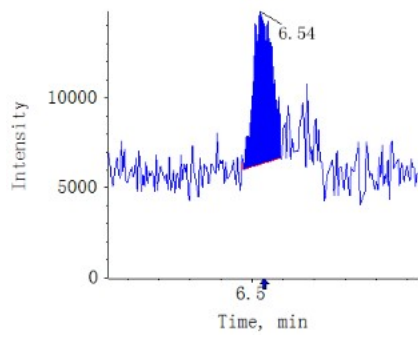

**PB+CAH**

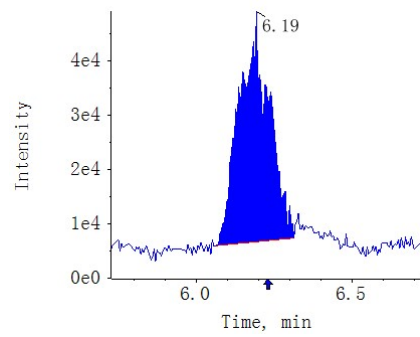

**Standard of p-coumaric acid\_0.1ppm**

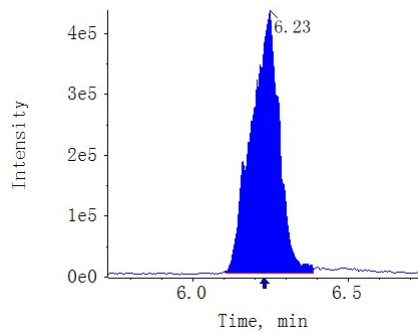

**BLANK**

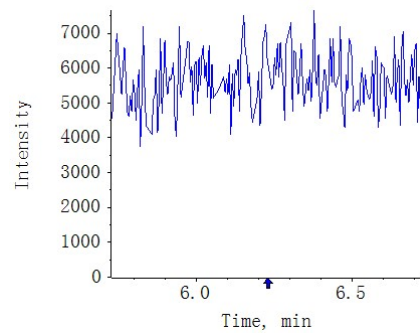

**Figure S2. Chromatography of p-coumaric acid (CA) contents determined from serum using UPLC-MS/MS.**
